# Supplementary material for: Lipid droplet‐dependent fatty acid metabolism controls the immune suppressive phenotype of tumor‐associated macrophages
Source: PubMed Central journal article supplement (PMC6835560; doi:10.15252/emmm.201910698), 2019-10-10
Supplement: EMMM-11-e10698-s001.pdf [file EMMM-11-e10698-s001.pdf]

## Supplementary Materials

### Table of contents:

Figure S1. Oleate-polarized Gr1<sup>-</sup>CD11b<sup>+</sup> myeloid cells promote tumor growth.

Figure S2. PGE2 controls the inhibitory function but not the phenotype of Gr1-CD11b<sup>+</sup> myeloid cells.

Figure S3. Diminished polarization of CD206<sup>+</sup> myeloid cells by SCD1 inhibitor can be neutralized by exogenous oleate.

Figure S4. Size measurement of the encapsulated liposome with several inhibitors.

Figure S5. Both, bone marrow hematopoietic stem cells and monocytes can polarize into CD206<sup>+</sup> suppressive myeloid cells.

Figure S6. Lipid droplet analysis in TAMs of gastro-esophageal cancer patients.

Table S1. Significantly distinct pathways between control and oleate group based on enrichment score and p-value from microarray.

Table S2. Supplementary Material and Methods: Antibody dilutions.

Table S3. Supplementary Material and Methods: Exact p-values and statistical tests.

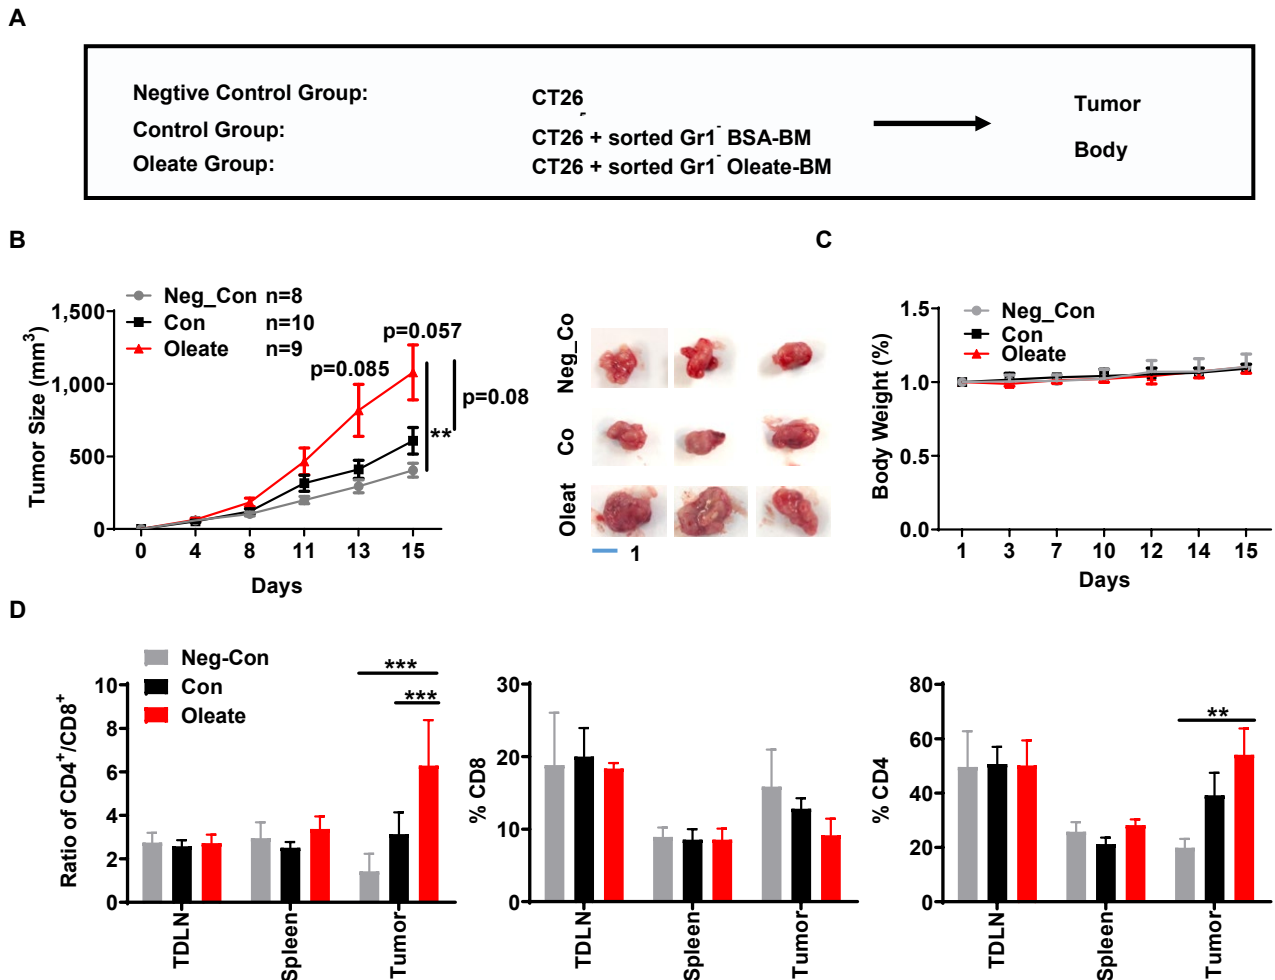

**Fig. S1. Oleate-polarized Gr1<sup>+</sup>CD11b<sup>+</sup> myeloid cells promote tumor growth.**

(A) The experimental procedure to test the pro-tumoral function of Gr1<sup>+</sup>CD11b<sup>+</sup> myeloid cells is shown.  $5 \times 10^5$  CT26 colon carcinoma cells were mixed with myeloid cells in the ratio of 1:1 and inoculated into Balb/c mice. (B) Tumor growth as well as (C) body weight were monitored every 2-4 days. Tumor bearing mice were sacrificed on day 15. (D) Tumors were isolated and digested for immune cell analysis via flow cytometry. Shown is the mean $\pm$ SEM from two to four independent experiments. Two-way analysis of variance (ANOVA) with Tukey's post hoc test was performed to compare the tumor growth as well as immune cell analysis. \* $p < 0.05$ ; \*\* $p \leq 0.01$

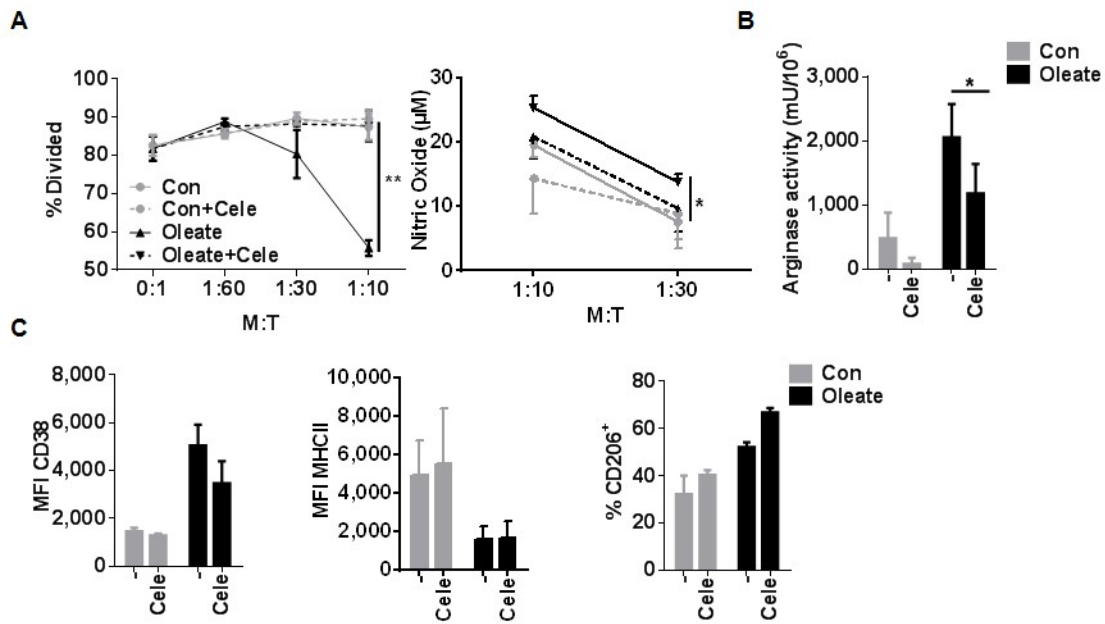

**Fig. S2. PGE<sub>2</sub> controls the inhibitory function but not the phenotype of Gr1-CD11b<sup>+</sup> myeloid cells.**

Bone marrow cells were isolated and polarized in the presence or absence of 5 µM celecoxib (Cele) in the presence of 40 ng/ml GM-CSF for 6 days. (A) T cell proliferation assay was performed via co-culture with purified CD4<sup>+</sup> T cell in the ratios indicated. (B) 1×10<sup>6</sup> myeloid cells after polarization were lysed for arginase activity assay. (C) The expression of CD38, MHCII as well as the proportion of CD206<sup>+</sup> myeloid cells was analyzed via flow cytometry. Shown is the mean±SD from two to four independent experiments. Two-way ANOVA with Tukey's post hoc test was performed to compare the T cell proliferation in oleate group ± celecoxib treatment. \*p<0.05

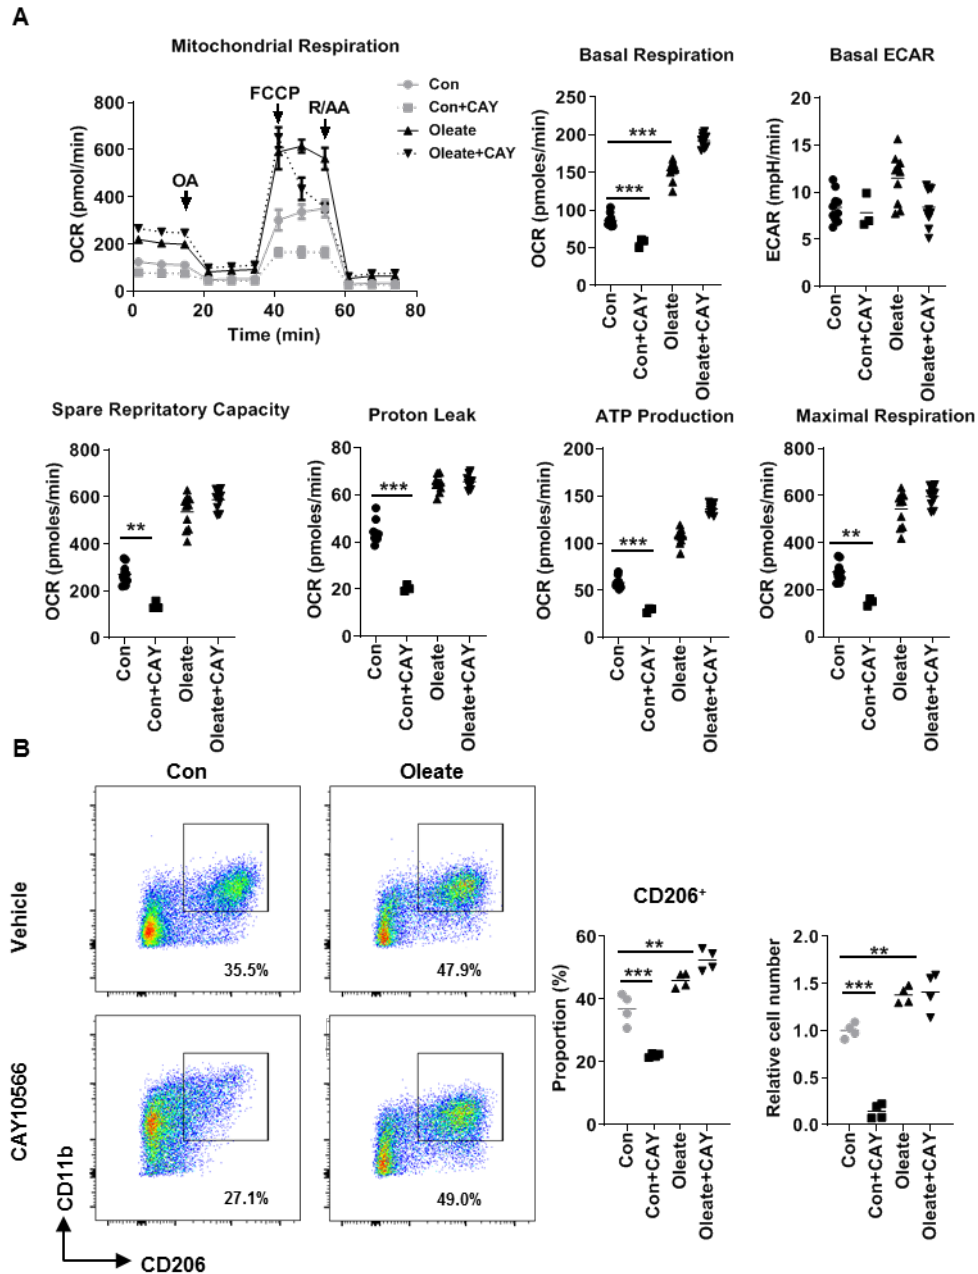

**Fig. S3. Diminished polarization of CD206<sup>+</sup> myeloid cells by SCD1 inhibitor can be neutralized by exogenous oleate.**

Bone marrow cells were isolated and polarized in the presence or absence of 10 nM SCD1 inhibitor CAY10566 in the presence of 40 ng/ml GM-CSF for 6 days. (A) The oxygen consumption rate of  $1 \times 10^5$  purified Gr1<sup>-</sup> cells was monitored after the addition of oligomycin (OA) (1  $\mu$ M), the uncoupler carbonyl cyanide-4-(trifluoromethoxy) phenylhydrazone (FCCP, 1  $\mu$ M), and the electron transport inhibitor rotenone and antimycin A (R/AA) (0.5  $\mu$ M) at

indicated time points. The value of basal oxygen consumption rate (OCR), basal extracellular acidification rate (ECAR), spare respiratory capacity, proton leak, ATP production and maximal respiration were calculated. (B) The percentage and absolute number of CD206<sup>+</sup> suppressive myeloid cells were calculated based on flow cytometry. Shown is the mean±SD from two to four independent experiments. Two-way ANOVA with Tukey's post hoc test was performed to compare the effect of CAY10566 in control and oleate group. \*\*p≤0.01; \*\*\*p≤0.001

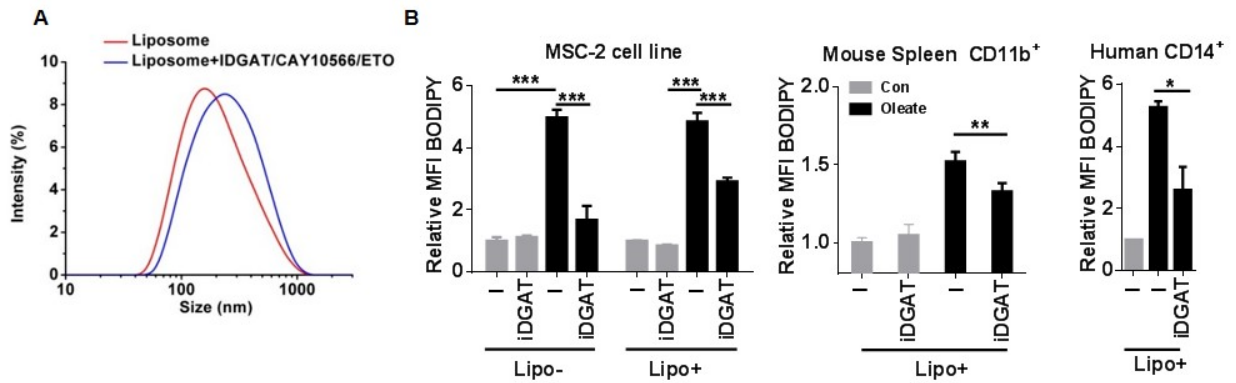

**Fig. S4. Size measurement of the encapsulated liposome with several inhibitors.**

(A) The sizes of control vehicle and liposomes encapsulated with inhibitors were measured by a laser particle size analyzer at a wavelength of 633 nm with a constant angle of 173 °. The diameter of micelles was calculated from the average of three individual experiments. (B) To validate the efficiency of iDGAT-liposome, MSC-2 cell line, splenocytes or human CD14<sup>+</sup> monocytes were treated with oleate. Twenty-four hours later, cells were collected for BODIPY and antibody staining for the indicated markers. Shown is the mean±SEM from two to four independent experiments. One-way ANOVA was performed to compare the effect of iDGAT-encapsulated liposome in MSC-2 cell line, mouse spleen CD11b<sup>+</sup> cells and human CD14<sup>+</sup> cells.

\* $p < 0.05$ ; \*\* $p \leq 0.01$

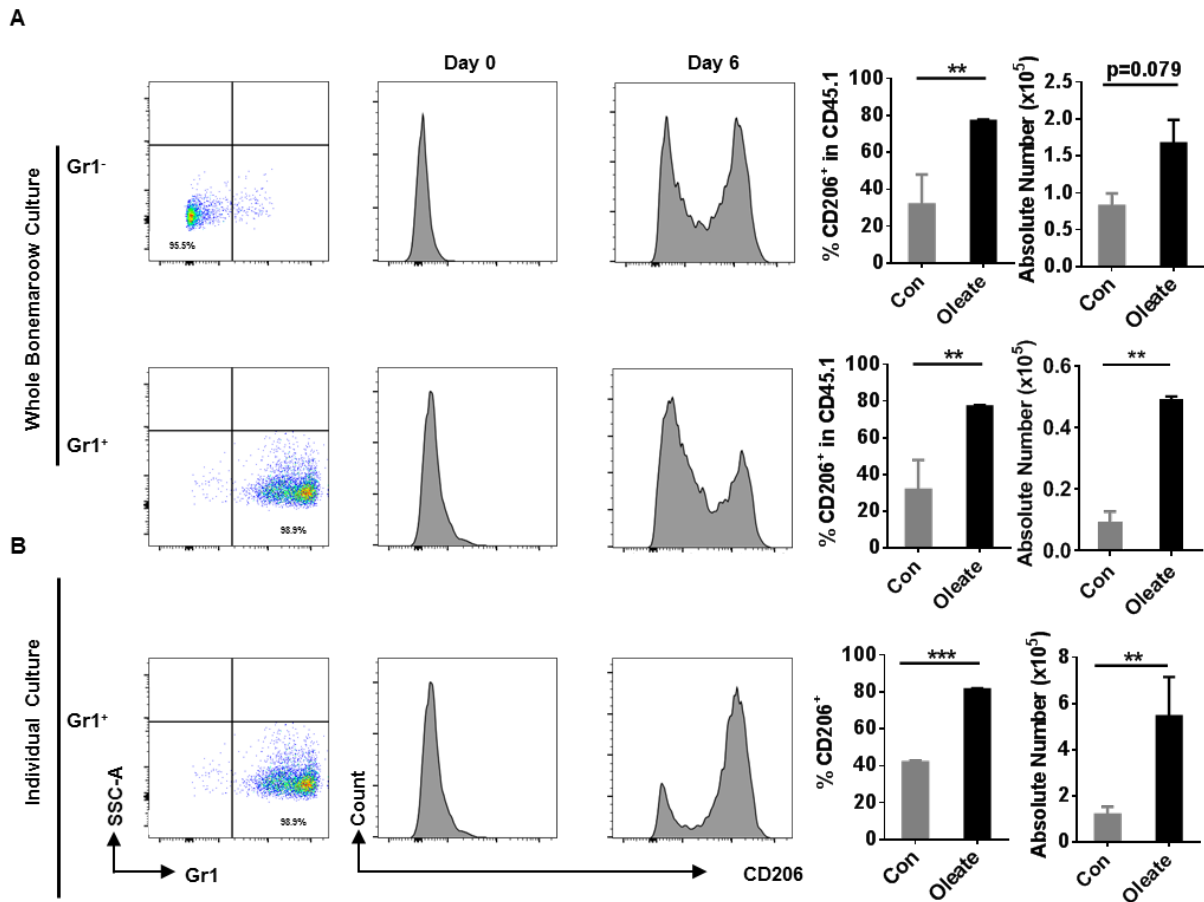

**Fig. S5. Both, bone marrow hematopoietic stem cells and monocytes can polarize into CD206<sup>+</sup> suppressive myeloid cells.**

Gr1<sup>-</sup> and Gr1<sup>+</sup> cells bone marrow (CD45.1<sup>+</sup>) were isolated and mixed with CD45.2<sup>+</sup> bone marrow cells for polarization assay in the presence of oleate. (A) The frequency of CD45.1<sup>+</sup>CD206<sup>+</sup> myeloid cells was analyzed via flow cytometry on day 6. (B) To avoid the impact of other cells, the same bone marrow purified Gr1<sup>+</sup> cells were also individually cultured for 6 days. Shown is the mean±SD from two to four independent experiments. Unpaired Student's two-tailed t tests were performed to compare the percentage of CD206<sup>+</sup> cells in different groups. \*\*p≤0.01; \*\*\*p≤0.001

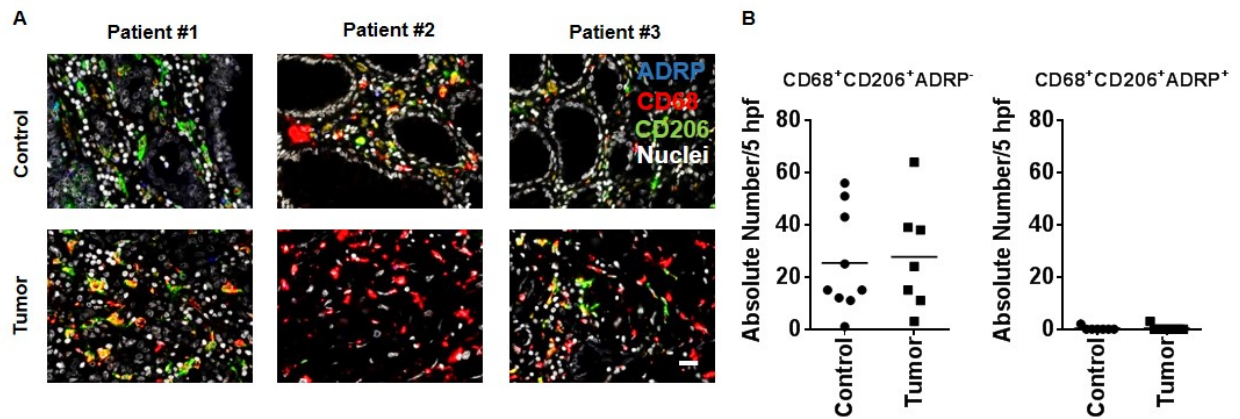

**Fig. S6. Lipid droplet analysis in TAMs of gastro-esophageal cancer patients.**

Tumor tissue (Tumor) as well as corresponding adjacent tissue (Control) from gastro-esophageal cancer patients served for histology staining. (A) CD68 (red), CD206 (green) and ADRP (blue) staining were performed to identify the lipid droplets in tumor infiltrating myeloid cells. Nuclei are visible in white (scale bar = 20  $\mu$ m). (B) The absolute number of double/triple positive cells in 5 high-power fields (hpf) was determined.



| <b>Biological Process/<br/>Cellular Component</b>                                                                    | <b>Enrichment<br/>Score</b> | <b>Enrichment<br/>p-value</b> | <b>% genes in<br/>group that<br/>are present</b> | <b># genes<br/>in list, in<br/>group</b> | <b>GO ID</b> |
|----------------------------------------------------------------------------------------------------------------------|-----------------------------|-------------------------------|--------------------------------------------------|------------------------------------------|--------------|
| <b>antigen processing<br/>and presentation of<br/>peptide or<br/>polysaccharide<br/>antigen via MHC<br/>class II</b> | 24.3938                     | 2.54622e-<br>011              | 80                                               | 8                                        | 2504         |
| <b>MHC class II protein<br/>complex</b>                                                                              | 23.1209                     | 9.09299e-<br>011              | 72.7273                                          | 8                                        | 42613        |
| <b>response to hypoxia</b>                                                                                           | 10.0506                     | 4.31603e-<br>005              | 9.13978                                          | 17                                       | 1666         |
| <b>response to<br/>interferon-<math>\gamma</math></b>                                                                | 9.74438                     | 5.86234e-<br>005              | 25                                               | 6                                        | 34341        |
| <b>sprouting<br/>angiogenesis</b>                                                                                    | 8.03979                     | 0.000322378                   | 18.75                                            | 6                                        | 2040         |
| <b>positive regulation of<br/>angiogenesis</b>                                                                       | 6.82014                     | 0.00109157                    | 9.61538                                          | 10                                       | 45766        |
| <b>negative regulation of<br/>activated T cell<br/>proliferation</b>                                                 | 5.27041                     | 0.00514148                    | 50                                               | 2                                        | 46007        |

**Table S1. Significantly distinct pathways between control and oleate group based on enrichment score and *p*-value from microarray.**

| Antibody                                   | Dilution |
|--------------------------------------------|----------|
| <b>Flow cytometry</b>                      |          |
| Mouse CD4 (clone GK1.5) APC                | 1:400    |
| Mouse CD8a (clone 53-6.7) FITC             | 1:400    |
| Mouse CD11b (clone M1/70) APC-Cy7          | 1:400    |
| Mouse CD11c (clone N418) PerCP-Cy5.5       | 1:400    |
| Mouse MHCII (clone M5-114.15.2) APC        | 1:400    |
| Mouse Gr1 (clone RB6-8C6) APC              | 1:1000   |
| Mouse CD38 (clone HIT2) eFluor 450         | 1:200    |
| Mouse CD73 (clone TY/11.8) PE-Cy7          | 1:200    |
| Mouse CD206 (clone MR5D3) Alexa488         | 1:50     |
| Human CD204 (clone UC23-56) PE             | 1:50     |
| Human CD206 (clone 19.2) eFluor 450        | 1:50     |
| Human CD38 (clone HB7) PE-Cy7              | 1:50     |
| Human CD73 (clone AD2) FITC                | 1:50     |
| <b>Immunohistochemistry</b>                |          |
| Mouse CD8a (clone D4W2Z)                   | 1:200    |
| Human ADRP (Rabbit Polyclonal)             | 1:800    |
| Human CD68 (clone PG-M1)                   | 1:250    |
| Human CD206 (clone 5C11)                   | 1:500    |
| <b>Western Blot</b>                        |          |
| Mouse mTOR (Rabbit Polyclonal)             | 1:1000   |
| Mouse mTOR (pSer 2448) (Rabbit Polyclonal) | 1:1000   |
| Mouse mTOR (pSer 2481) (Rabbit Polyclonal) | 1:1000   |
| Mouse anti-b-actin (clone AC-15)           | 1:2000   |

**Table S2.** Supplementary Material and Methods: Antibody dilutions.

| <b>Figure</b>                     | <b>Comparison</b>        | <b>P value</b> | <b>Statistic Methods</b>          |
|-----------------------------------|--------------------------|----------------|-----------------------------------|
| Fig1.C-CD11c                      | Con vs Oleate            | 0,0083         | Student t-test                    |
| Fig1.C-MHCII                      | Con vs Oleate            | 0,0105         | Student t-test                    |
| Fig1.C-CD206                      | Con vs Oleate            | 0,0077         | Student t-test                    |
| Fig1.C-CD73                       | Con vs Oleate            | 0,0148         | Student t-test                    |
| Fig1.C-CD38                       | Con vs Oleate            | 0,0027         | Student t-test                    |
| Fig1.C-Arginase activity          | Con vs Oleate            | 0,0029         | Student t-test                    |
|                                   |                          |                |                                   |
| Fig2.B Basal OCR                  | Con vs Oleate            | <0.0001        | Tukey's multiple comparisons test |
| Fig2.B Basal OCR                  | Oleate vs Stearate       | <0.0001        | Tukey's multiple comparisons test |
| Fig2.B Basal ECAR                 | Oleate vs Stearate       | 0,0012         | Tukey's multiple comparisons test |
| Fig2.B Spare respiratory capacity | Con vs Oleate            | 0,0051         | Tukey's multiple comparisons test |
| Fig2.B Spare respiratory capacity | Oleate vs Stearate       | <0.0001        | Tukey's multiple comparisons test |
| Fig2.B Proton leak                | Con vs Oleate            | <0.0001        | Tukey's multiple comparisons test |
| Fig2.B Proton leak                | Oleate vs Stearate       | <0.0001        | Tukey's multiple comparisons test |
| Fig2.B ATP production             | Con vs Oleate            | 0,0001         | Tukey's multiple comparisons test |
| Fig2.B ATP production             | Oleate vs Stearate       | 0,0001         | Tukey's multiple comparisons test |
| Fig2.B Maximum respiration        | Con vs Oleate            | <0.0001        | Tukey's multiple comparisons test |
| Fig2.B Maximum respiration        | Oleate vs Stearate       | <0.0001        | Tukey's multiple comparisons test |
|                                   |                          |                |                                   |
| Fig2.C Basal OCR                  | Con vs Oleate            | <0.0001        | Tukey's multiple comparisons test |
| Fig2.C Spare respiratory capacity | Con vs Con+ETO           | 0,0222         | Tukey's multiple comparisons test |
| Fig2.C Spare respiratory capacity | Con vs Oleate            | <0.0001        | Tukey's multiple comparisons test |
| Fig2.C Spare respiratory capacity | Oleate vs Oleate+ETO     | 0,0034         | Tukey's multiple comparisons test |
| Fig2.C Proton leak                | Con vs Oleate            | 0,0043         | Tukey's multiple comparisons test |
| Fig2.C ATP production             | Con vs Oleate            | <0.0001        | Tukey's multiple comparisons test |
| Fig2.C ATP production             | Oleate vs Oleate+ETO     | 0,0128         | Tukey's multiple comparisons test |
| Fig2.C Maximum respiration        | Con vs Oleate            | 0,0157         | Tukey's multiple comparisons test |
| Fig2.C Maximum respiration        | Con vs Con+ETO           | <0.0001        | Tukey's multiple comparisons test |
| Fig2.C Maximum respiration        | Oleate vs Oleate+ETO     | 0,0031         | Tukey's multiple comparisons test |
|                                   |                          |                |                                   |
| Fig2.F %CD206                     | Con vs Oleate            | 0,0004         | Tukey's multiple comparisons test |
| Fig2.F %CD206                     | Oleate vs Oleate+ETO     | <0.0001        | Tukey's multiple comparisons test |
| Fig2.F %CD206                     | Stearate vs Stearate+ETO | 0,0375         | Tukey's multiple comparisons test |
| Fig2.F MFI CD38                   | Con vs Oleate            | <0.0001        | Tukey's multiple comparisons test |
| Fig2.F MFI CD38                   | Oleate vs Oleate+ETO     | <0.0001        | Tukey's multiple comparisons test |
| Fig2.F MFI CD38                   | Oleate vs Stearate       | <0.0001        | Tukey's multiple comparisons test |
| Fig2.F MFI CD73                   | Con vs Oleate            | <0.0001        | Tukey's multiple comparisons test |
| Fig2.F MFI CD73                   | Oleate vs Oleate+ETO     | <0.0001        | Tukey's multiple comparisons test |
| Fig2.F MFI CD73                   | Oleate vs Stearate       | <0.0001        | Tukey's multiple comparisons test |
|                                   |                          |                |                                   |
| Fig2.H %Divided                   | Oleate vs Oleate+ETO     | 0,0238         | Tukey's multiple comparisons test |
| Fig2.I % Nitric Oxide             | Oleate vs Oleate+ETO     | <0.0001        | Tukey's multiple comparisons test |
| Fig2.I % Nitric Oxide             | Stearate vs Stearate+ETO | <0.0001        | Tukey's multiple comparisons test |

|                                   |                        |         |                                   |
|-----------------------------------|------------------------|---------|-----------------------------------|
| Fig3.B Basal OCR                  | Oleate vs Oleate+iDGAT | 0,0005  | Tukey's multiple comparisons test |
| Fig3.B Basal OCR                  | Oleate vs Oleate+MJN   | <0.0001 | Tukey's multiple comparisons test |
| Fig3.B ATP production             | Oleate vs Oleate+iDGAT | 0,0009  | Tukey's multiple comparisons test |
| Fig3.B ATP production             | Oleate vs Oleate+Atg   | 0,0049  | Tukey's multiple comparisons test |
| Fig3.B ATP production             | Oleate vs Oleate+MJN   | <0.0001 | Tukey's multiple comparisons test |
| Fig.3C CD206%                     | Con vs Con+MJN1 10     | 0,0192  | Tukey's multiple comparisons test |
| Fig.3C CD206%                     | Oleate vs Oleate+iDGAT | <0.0001 | Tukey's multiple comparisons test |
| Fig.3C CD206%                     | Oleate vs Oleate+Atg   | 0,0006  | Tukey's multiple comparisons test |
| Fig.3C CD206%                     | Oleate vs Oleate+MJN   | <0.0001 | Tukey's multiple comparisons test |
| Fig.3D % Divided                  | Con vs Oleate          | <0.0001 | Tukey's multiple comparisons test |
| Fig.3D % Divided                  | Oleate vs Oleate+MJN   | 0,012   | Tukey's multiple comparisons test |
| Fig.3D Proliferation Index        | Con vs Oleate          | <0.0001 | Tukey's multiple comparisons test |
| Fig.3D Proliferation Index        | Oleate vs Oleate+MJN   | 0,0008  | Tukey's multiple comparisons test |
| Fig.3D Proliferation Index        | Oleate vs Oleate+Atg   | 0,0007  | Tukey's multiple comparisons test |
| Fig.3E                            | Oleate vs Oleate+Atg   | <0.0001 | Tukey's multiple comparisons test |
| Fig.3F M:T=1:30                   | Con vs Oleate          | <0.0001 | Tukey's multiple comparisons test |
| Fig.3F M:T=1:30                   | Oleate vs Oleate+MJN   | <0.0001 | Tukey's multiple comparisons test |
| Fig.3F M:T=1:30                   | Oleate vs Oleate+Atg   | <0.0001 | Tukey's multiple comparisons test |
| Fig.3F M:T=1:60                   | Con vs Oleate          | <0.0001 | Tukey's multiple comparisons test |
| Fig.3F M:T=1:60                   | Oleate vs Oleate+MJN   | <0.0001 | Tukey's multiple comparisons test |
| Fig.3F M:T=1:60                   | Oleate vs Oleate+Atg   | <0.0001 | Tukey's multiple comparisons test |
| Fig.4A                            | Oleate vs Oleate+Rapa  | 0,0128  | Tukey's multiple comparisons test |
| Fig.4B Proliferation Index        | Oleate vs Oleate+Rapa  | 0,0097  | Tukey's multiple comparisons test |
| Fig.4B Nitric Oxide M:T=1: 30     | Con vs Con+Rapa        | 0,0477  | Tukey's multiple comparisons test |
| Fig.4B Nitric Oxide M:T=1: 30     | Con vs Oleate          | 0,0058  | Tukey's multiple comparisons test |
| Fig.4B Nitric Oxide M:T=1: 30     | Oleate vs Oleate+Rapa  | 0,0017  | Tukey's multiple comparisons test |
| Fig.4B Nitric Oxide M:T=1: 60     | Con vs Oleate          | 0,0041  | Tukey's multiple comparisons test |
| Fig.4B Nitric Oxide M:T=1: 60     | Oleate vs Oleate+Rapa  | 0,0011  | Tukey's multiple comparisons test |
| Fig.4B % of divided               | Oleate vs Oleate+Rapa  | 0,0251  | Tukey's multiple comparisons test |
| Fig.4C Basal OCR                  | Con vs Oleate          | 0,045   | Tukey's multiple comparisons test |
| Fig.4C Basal OCR                  | Oleate vs Oleate+Rapa  | <0.0001 | Tukey's multiple comparisons test |
| Fig.4C Spare respiratory capacity | Con vs Oleate          | 0,0006  | Tukey's multiple comparisons test |
| Fig.4C Spare respiratory capacity | Con vs Con+Rapa        | <0.0001 | Tukey's multiple comparisons test |
| Fig.4C Spare respiratory capacity | Oleate vs Oleate+Rapa  | <0.0001 | Tukey's multiple comparisons test |
| Fig.4C Maximum Repiration         | Con vs Con+Rapa        | 0,0014  | Tukey's multiple comparisons test |
| Fig.4C Maximum Repiration         | Oleate vs Oleate+Rapa  | <0.0001 | Tukey's multiple comparisons test |
| Fig.4C ATP production             | Con vs Oleate          | 0,0063  | Tukey's multiple comparisons test |
| Fig.4C ATP production             | Oleate vs Oleate+Rapa  | <0.0001 | Tukey's multiple comparisons test |

|                                    |                                |         |                                        |
|------------------------------------|--------------------------------|---------|----------------------------------------|
| Fig.4D Gr1-CD11b+                  | day6 Con vs Oleate             | 0,0074  | Bonferroni's multiple comparisons test |
| Fig.4D Gr1+CD11b+                  | day6 Con vs Oleate             | 0,0297  | Bonferroni's multiple comparisons test |
|                                    |                                |         |                                        |
| Fig.5 A MCA205                     | Con vs Oleate                  | 0,0266  | Student t-test                         |
| Fig.5 A CT26                       | Con vs Oleate                  | <0.0001 | Student t-test                         |
| Fig.5 B Day12                      | Con vs Oleate                  | 0,0453  | Bonferroni's multiple comparisons test |
| Fig.5 B Day14                      | Con vs Oleate                  | 0,0028  | Bonferroni's multiple comparisons test |
| Fig.5 D Overall                    | Liposome vs Liposome +iDGAT    | 0,0405  | Two-way ANOVA                          |
| Fig.5 D Day 28                     | Liposome vs Liposome +iDGAT    | 0,0004  | Bonferroni's multiple comparisons test |
| Fig.5 E                            | Tumor Lipo vs Tumor Lipo+iDGAT | 0,0039  | Tukey's multiple comparisons test      |
| Fig.5 F                            | PBS vs. Liposome+iDGAT         | <0.0001 | Tukey's multiple comparisons test      |
| Fig.5 F                            | Liposome+iDGAT vs. Liposome    | <0.0001 | Tukey's multiple comparisons test      |
|                                    |                                |         |                                        |
| Fig.6A CD206                       | Con vs Oleate                  | <0.0001 | Tukey's multiple comparisons test      |
| Fig.6A CD206                       | Oleate vs Stearate             | <0.0001 | Tukey's multiple comparisons test      |
| Fig.6A CD206                       | Con vs Stearate                | 0,0004  | Tukey's multiple comparisons test      |
| Fig.6A CD204                       | Con vs Oleate                  | 0,0171  | Tukey's multiple comparisons test      |
| Fig.6A CD204                       | Oleate vs Stearate             | 0,0181  | Tukey's multiple comparisons test      |
| Fig.6A CD38                        | Con vs Oleate                  | 0,0007  | Tukey's multiple comparisons test      |
| Fig.6A CD38                        | Oleate vs Stearate             | <0.0001 | Tukey's multiple comparisons test      |
| Fig.6D                             | Con vs Oleate                  | 0..0036 | Tukey's multiple comparisons test      |
| Fig.6D                             | Oleate vs Oleate+iDGAT         | 0,03    | Tukey's multiple comparisons test      |
| Fig.6E                             | Control vs Tumor               | 0,0374  | Student t-test                         |
|                                    |                                |         |                                        |
| Fig. S1B                           | Neg_Con vs Oleate              | 0,0072  | Two-way ANOVA                          |
| Fig. S1D ratio of CD4+/CD8+        | Tumor neg-Con vs Tumor Oleate  | <0.0001 | Tukey's multiple comparisons test      |
| Fig. S1D ratio of CD4+/CD8+        | Tumor Con vs Tumor Oleate      | 0,0005  | Tukey's multiple comparisons test      |
| Fig. S1D % of CD4                  | Tumor neg-Con vs Tumor Oleate  | <0.0001 | Tukey's multiple comparisons test      |
|                                    |                                |         |                                        |
| Fig.S2A % Divided                  | Oleate vs Oleate+Cele          | 0,0014  | Two-way ANOVA                          |
| Fig.S2A Nitric Oxide               | Oleate vs Oleate+Cele          | 0,0481  | Two-way ANOVA                          |
| Fig.S2B                            | Oleate vs Oleate+Cele          | 0,0411  | Tukey's multiple comparisons test      |
|                                    |                                |         |                                        |
| Fig. S3A Basal OCR                 | Con vs Con+CAY                 | 0,0004  | Tukey's multiple comparisons test      |
| Fig. S3A Basal OCR                 | Con vs Oleate                  | <0.0001 | Tukey's multiple comparisons test      |
| Fig.S3A Spare respiratory capacity | Con vs Con+CAY                 | 0,0029  | Tukey's multiple comparisons test      |
| Fig.S3A Proton Leak                | Con vs Con+CAY                 | <0.0001 | Tukey's multiple comparisons test      |
| Fig.S3A ATP Production             | Con vs Con+CAY                 | <0.0001 | Tukey's multiple comparisons test      |
| Fig.S3A Maximal Respiration        | Con vs Con+CAY                 | 0,0042  | Tukey's multiple comparisons test      |
| Fig.S5B Proportion                 | Con vs Con+CAY                 | 0,0001  | Tukey's multiple comparisons test      |
| Fig.S5B Proportion                 | Con vs Oleate                  | 0,0085  | Tukey's multiple comparisons test      |
| Fig.S5B Relative cell number       | Con vs Con+CAY                 | <0.0001 | Tukey's multiple comparisons test      |
| Fig.S5B Relative cell number       | Con vs Oleate                  | 0,0055  | Tukey's multiple comparisons test      |
|                                    |                                |         |                                        |
| Fig. S4B Lipo-                     | Con vs Oleate                  | <0.0001 | Tukey's multiple comparisons test      |

|                              |                        |         |                                   |
|------------------------------|------------------------|---------|-----------------------------------|
| Fig. S4B Lipo-               | Oleate vs Oleate+iDGAT | <0.0001 | Tukey's multiple comparisons test |
| Fig. S4B Lipo+               | Con vs Oleate          | 0,0003  | Tukey's multiple comparisons test |
| Fig. S4B Lipo+               | Oleate vs Oleate+iDGAT | <0.0001 | Tukey's multiple comparisons test |
| Fig. S4B Mouse spleen CD11b+ | Oleate vs Oleate+iDGAT | 0,0022  | Tukey's multiple comparisons test |
| Fig. S4B Human CD14+         | Oleate vs Oleate+iDGAT | 0,0185  | Tukey's multiple comparisons test |
|                              |                        |         |                                   |
| Fig. S5A % CD206+            | Con vs Oleate          | 0,0014  | Student t-test                    |
| Fig. S5A % CD206+ in CD45.1  | Con vs Oleate          | 0,0014  | Student t-test                    |
| Fig. S5A Absolute number     | Con vs Oleate          | 0,0036  | Student t-test                    |
| Fig. S5B % CD206+            | Con vs Oleate          | 0,0005  | Student t-test                    |
| Fig. S5B Absolute number     | Con vs Oleate          | 0,0026  | Student t-test                    |

**Table S3.** Supplementary Material and Methods: Exact p-values and statistical tests.
